# Supplementary material for: One-Month Global Longitudinal Strain Identifies Patients Who Will Develop Pacing-Induced Left Ventricular Dysfunction over Time: The Pacing and Ventricular Dysfunction (PAVD) Study
Source: PLoS One. 2017 Jan 17;12(1):e0162072. doi: 10.1371/journal.pone.0162072 (PMC5240943; doi:10.1371/journal.pone.0162072)
Supplement: S1 File — (PDF) [file pone.0162072.s001.pdf]

| EPISODE | GROUP(VP>40% = 1, VP<40% = 2) | IMGLS <14.5 (1= YES, 2 = NO) PIVD at 1 month (decline in LVEF at 1 month >5%) | PIVD (DECLINE IN LVEF >5% AT 12 MONTHS, 1= YES, 0 = NO) | PICMP, LVEF<45% AT 12M (1= YES, 0 = NO) | AGE (1= <70, 2 = >70) | MALE | CHB (1= YES, AF (1= Af, 2= NO AF) | HYPERTENSION (1= YES, 2= NO) | IHD (1= YES, 2= NO) | DIABETES (1= YES, 2= NO) | NYHA CLASS(1 OR 2) | PACED QRSD >160 |
|---------|-------------------------------|-------------------------------------------------------------------------------|---------------------------------------------------------|-----------------------------------------|-----------------------|------|-----------------------------------|------------------------------|---------------------|--------------------------|--------------------|-----------------|
| 101     | 1                             | 1                                                                             | 0                                                       | 1                                       | 0                     | 1    | 0                                 | 1                            | 2                   | 2                        | 2                  | 1               |
| 102     | 1                             | 2                                                                             | 0                                                       | 1                                       | 0                     | 1    | 1                                 | 2                            | 2                   | 2                        | 2                  | 1               |
| 103     | 1                             | 1                                                                             | 0                                                       | 0                                       | 0                     | 0    | 0                                 | 2                            | 2                   | 2                        | 2                  | 1               |
| 104     | 1                             | 1                                                                             | 0                                                       | 0                                       | 0                     | 0    | 0                                 | 2                            | 2                   | 2                        | 2                  | 1               |
| 105     | 1                             | 1                                                                             | 0                                                       | 0                                       | 0                     | 1    | 0                                 | 2                            | 2                   | 2                        | 2                  | 1               |
| 106     | 1                             | 1                                                                             | 0                                                       | 1                                       | 0                     | 1    | 0                                 | 2                            | 2                   | 2                        | 2                  | 1               |
| 107     | 1                             | 1                                                                             | 0                                                       | 1                                       | 0                     | 1    | 1                                 | 2                            | 2                   | 2                        | 2                  | 1               |
| 108     | 1                             | 1                                                                             | 1                                                       | 1                                       | 1                     | 1    | 1                                 | 2                            | 2                   | 2                        | 2                  | 1               |
| 109     | 1                             | 1                                                                             | 1                                                       | 1                                       | 1                     | 1    | 1                                 | 1                            | 2                   | 2                        | 2                  | 2               |
| 110     | 1                             | 2                                                                             | 0                                                       | 0                                       | 0                     | 0    | 0                                 | 2                            | 2                   | 2                        | 2                  | 2               |
| 112     | 1                             | 2                                                                             | 0                                                       | 0                                       | 0                     | 1    | 0                                 | 2                            | 2                   | 2                        | 2                  | 1               |
| 113     | 1                             | 1                                                                             | 0                                                       | 0                                       | 0                     | 0    | 0                                 | 2                            | 1                   | 2                        | 2                  | 1               |
| 115     | 1                             | 1                                                                             | 1                                                       | 1                                       | 1                     | 0    | 1                                 | 1                            | 2                   | 2                        | 2                  | 1               |
| 116     | 1                             | 1                                                                             | 0                                                       | 1                                       | 0                     | 1    | 1                                 | 2                            | 2                   | 2                        | 2                  | 1               |
| 117     | 1                             | 2                                                                             | 0                                                       | 0                                       | 0                     | 0    | 0                                 | 2                            | 2                   | 2                        | 2                  | 2               |
| 121     | 1                             | 2                                                                             | 0                                                       | 0                                       | 0                     | 0    | 1                                 | 2                            | 2                   | 2                        | 2                  | 1               |
| 122     | 1                             | 1                                                                             | 0                                                       | 1                                       | 0                     | 0    | 0                                 | 1                            | 2                   | 1                        | 2                  | 1               |
| 125     | 1                             | 1                                                                             | 0                                                       | 1                                       | 0                     | 0    | 1                                 | 2                            | 2                   | 2                        | 2                  | 2               |
| 126     | 1                             | 1                                                                             | 0                                                       | 0                                       | 0                     | 1    | 1                                 | 2                            | 2                   | 1                        | 2                  | 1               |
| 130     | 1                             | 2                                                                             | 0                                                       | 0                                       | 0                     | 0    | 0                                 | 1                            | 2                   | 2                        | 2                  | 1               |
| 134     | 1                             | 2                                                                             | 0                                                       | 0                                       | 0                     | 0    | 0                                 | 2                            | 2                   | 2                        | 2                  | 2               |
| 135     | 1                             | 2                                                                             | 0                                                       | 0                                       | 1                     | 0    | 0                                 | 1                            | 2                   | 1                        | 2                  | 1               |
| 137     | 1                             | 2                                                                             | 0                                                       | 0                                       | 0                     | 1    | 1                                 | 2                            | 2                   | 1                        | 2                  | 2               |
| 138     | 1                             | 2                                                                             | 0                                                       | 0                                       | 0                     | 0    | 1                                 | 2                            | 2                   | 2                        | 2                  | 2               |
| 146     | 1                             | 1                                                                             | 0                                                       | 0                                       | 0                     | 1    | 0                                 | 1                            | 2                   | 1                        | 2                  | 2               |
| 151     | 1                             | 2                                                                             | 1                                                       | 1                                       | 0                     | 0    | 1                                 | 2                            | 2                   | 2                        | 2                  | 1               |
| 153     | 1                             | 1                                                                             | 0                                                       | 1                                       | 0                     | 1    | 1                                 | 2                            | 2                   | 1                        | 1                  | 1               |
| 154     | 1                             | 2                                                                             | 0                                                       | 0                                       | 0                     | 1    | 1                                 | 2                            | 2                   | 1                        | 2                  | 2               |
| 159     | 1                             | 2                                                                             | 0                                                       | 0                                       | 0                     | 0    | 0                                 | 1                            | 2                   | 2                        | 2                  | 1               |
| 111     | 1                             | 2                                                                             | 0                                                       | 0                                       | 0                     | 1    | 0                                 | 2                            | 2                   | 2                        | 2                  | 2               |
| 114     | 2                             | 1                                                                             | 0                                                       | 0                                       | 0                     | 0    | 1                                 | 2                            | 2                   | 2                        | 2                  | 1               |
| 118     | 2                             | 2                                                                             | 0                                                       | 0                                       | 0                     | 0    | 1                                 | 1                            | 2                   | 2                        | 2                  | 1               |
| 119     | 2                             | 1                                                                             | 0                                                       | 0                                       | 0                     | 1    | 1                                 | 2                            | 2                   | 1                        | 2                  | 2               |
| 120     | 2                             | 2                                                                             | 0                                                       | 0                                       | 0                     | 0    | 1                                 | 2                            | 2                   | 2                        | 2                  | 1               |
| 123     | 2                             | 2                                                                             | 0                                                       | 0                                       | 0                     | 1    | 0                                 | 2                            | 1                   | 1                        | 2                  | 2               |
| 124     | 2                             | 2                                                                             | 1                                                       | 1                                       | 0                     | 0    | 1                                 | 2                            | 2                   | 1                        | 1                  | 2               |
| 127     | 2                             | 1                                                                             | 0                                                       | 0                                       | 0                     | 0    | 1                                 | 2                            | 2                   | 2                        | 2                  | 2               |
| 128     | 2                             | 2                                                                             | 0                                                       | 0                                       | 0                     | 0    | 1                                 | 2                            | 2                   | 2                        | 2                  | 2               |
| 129     | 2                             | 2                                                                             | 0                                                       | 0                                       | 0                     | 0    | 1                                 | 2                            | 2                   | 2                        | 2                  | 2               |
| 131     | 2                             | 2                                                                             | 0                                                       | 0                                       | 0                     | 0    | 1                                 | 2                            | 2                   | 2                        | 2                  | 2               |
| 132     | 2                             | 2                                                                             | 0                                                       | 0                                       | 0                     | 0    | 0                                 | 2                            | 2                   | 2                        | 2                  | 2               |
| 133     | 2                             | 2                                                                             | 0                                                       | 0                                       | 0                     | 0    | 0                                 | 2                            | 2                   | 2                        | 2                  | 2               |
| 136     | 2                             | 2                                                                             | 0                                                       | 0                                       | 0                     | 0    | 0                                 | 2                            | 2                   | 2                        | 2                  | 2               |
| 139     | 2                             | 1                                                                             | 0                                                       | 0                                       | 0                     | 1    | 0                                 | 2                            | 2                   | 2                        | 2                  | 2               |
| 140     | 2                             | 2                                                                             | 0                                                       | 0                                       | 0                     | 1    | 1                                 | 2                            | 2                   | 1                        | 1                  | 2               |
| 141     | 2                             | 2                                                                             | 0                                                       | 0                                       | 0                     | 0    | 1                                 | 2                            | 2                   | 2                        | 2                  | 2               |
| 142     | 2                             | 2                                                                             | 0                                                       | 0                                       | 0                     | 0    | 0                                 | 2                            | 2                   | 2                        | 1                  | 2               |
| 143     | 2                             | 1                                                                             | 0                                                       | 0                                       | 0                     | 1    | 0                                 | 2                            | 1                   | 1                        | 2                  | 1               |
| 144     | 2                             | 2                                                                             | 0                                                       | 0                                       | 0                     | 0    | 1                                 | 2                            | 2                   | 2                        | 1                  | 2               |
| 145     | 2                             | 1                                                                             | 1                                                       | 1                                       | 0                     | 0    | 0                                 | 2                            | 2                   | 2                        | 2                  | 1               |
| 147     | 2                             | 2                                                                             | 0                                                       | 1                                       | 0                     | 1    | 1                                 | 2                            | 1                   | 1                        | 2                  | 2               |
| 148     | 2                             | 2                                                                             | 0                                                       | 0                                       | 0                     | 1    | 1                                 | 2                            | 1                   | 1                        | 1                  | 1               |
| 149     | 2                             | 2                                                                             | 0                                                       | 0                                       | 0                     | 1    | 1                                 | 2                            | 1                   | 2                        | 2                  | 2               |
| 150     | 2                             | 2                                                                             | 0                                                       | 0                                       | 0                     | 1    | 0                                 | 2                            | 1                   | 2                        | 2                  | 2               |
| 152     | 2                             | 2                                                                             | 1                                                       | 1                                       | 0                     | 1    | 1                                 | 2                            | 2                   | 2                        | 2                  | 1               |
| TOTALS  |                               | 22                                                                            | 8                                                       | 15                                      |                       |      |                                   |                              |                     |                          |                    |                 |
